# Why flying insects gather at artificial light

**Authors:** \*Samuel T Fabian<sup>1</sup>, \*Yash Sondhi<sup>2</sup>, Pablo Allen<sup>3</sup>, +Jamie Theobald<sup>2</sup>, +Huai-Ti Lin<sup>1</sup>

\*co-first

+co-last

**Corresponding authors:** [s.fabian@imperial.ac.uk](mailto:s.fabian@imperial.ac.uk), [yashsondhi@gmail.com](mailto:yashsondhi@gmail.com)

**Keywords:** dorsal light response, dragonfly, flight control, moth, navigation, phototaxis

## Author Affiliation:

<sup>1</sup>Department of Bioengineering, Imperial College London, SW7 2AZ, United Kingdom

<sup>2</sup>Department of Biology, Florida International University, Miami FL 33174 USA

<sup>3</sup>Council on International Educational Exchange, Monteverde Apto 43-5655, Costa Rica

**Abstract:** For millennia, humans have watched nocturnal insects flying erratically around fires and lamps. Explanations have included theories of “lunar navigation” and “escape to light”. However, without three-dimensional flight data to test them rigorously, this odd behaviour has remained unexplained. We employed high-resolution motion capture in the laboratory and stereo-videography in the field to reconstruct the 3D kinematics of insect flights around artificial lights. Contrary to the expectation of attraction, insects do not steer directly toward the light. Instead, insects turn their dorsum toward the light, generating flight bouts perpendicular to the source. Under natural sky light, tilting the dorsum towards the brightest visual hemisphere helps maintain proper flight attitude and control. Near artificial sources, however, this highly conserved dorsal-light-response can produce continuous steering around the light and trap an insect. Our guidance model demonstrates that this dorsal tilting is sufficient to create the seemingly erratic flight paths of insects near lights and is the most plausible model for why flying insects gather at artificial lights.

# **Main/ Introduction**

The interaction between flying insects and artificial light, is such a common occurrence that it has inspired the saying “drawn like a moth to a flame”<sup>1</sup>. Artificial light is an ancient method to trap insects, with the earliest written records dating back to the Roman Empire around 1 AD<sup>2,3</sup>. Efforts to improve light trap efficiency have generated many observations about nocturnal phototaxis, including phenomenological data on the effects of wavelength, the moon, sky brightness, and weather<sup>4,5</sup>. Consequently, several qualitative models of how insects gather at light have been proposed<sup>6</sup>. Some of the most popular theories are: (1) Insects are drawn to light through an escape mechanism, directing their flight toward it as they might aim for a gap in the foliage<sup>7</sup>. (2) Insects use the moon as a celestial compass cue to navigate, and mistakenly use artificial light sources instead<sup>8</sup>. (3) Thermal radiation from light sources is attractive to flying insects<sup>9</sup>. (4) The sensitive night-adapted eyes of insects are blinded by artificial lights, causing them to fly erratically or crash, and trapping them near light sources<sup>10,11</sup>. Understanding how insects interact with artificial light is particularly important amid modern increases in light pollution that are a growing contributor to insect declines<sup>12,13</sup>.

Compared to the abundance of hypotheses, the kinematic data required to test their predictions are exceedingly rare<sup>11,14</sup>. The thermal radiation model has been conclusively found to be flawed<sup>15</sup>, while other models continue to be proposed today<sup>16,17</sup>. Why has a conclusive answer evaded us? In part, because 3D tracking of small flying objects in low light is technically challenging, and necessary tools did not exist<sup>18</sup>. That did not stop researchers from attempting innovative experiments, such as attaching moths to polystyrene boats<sup>11</sup>. However, in-flight 3D flight trajectory and orientation measurements have remained difficult<sup>19,20</sup>. We leveraged advances in camera hardware and tracking software to consider the sensory requirements for insect flight control, and how artificial light may disrupt them.

Flying animals need a reliable way to determine their orientation with respect to the external world, especially with reference to the direction of gravity. Throughout the long evolutionary

history of insect flight, the brightest part of the visual field has been the sky, and thus it is a robust indicator of which way is up. This is true even at night, especially at short wavelengths<sup>21</sup>. Most flying insects display some form of the dorsal-light-response (DLR), a behaviour that keeps their dorsal (top) side to the brightest visual region<sup>22–26</sup>. This has been demonstrated in tethered insects but the behaviour phenomenon's effects are difficult to test in free flight<sup>22,23,26–28</sup>. We considered that the presence of an artificial point light source could: (1) reduce or remove the accuracy of the dorsal-light response and mislead insects to tilt their dorsum away from the sky; (2) misdirect lift-generation and disrupt flight-stability; (3) inhibit coherent heading control<sup>26,29</sup>. In contrast, diffused artificial light in the same plane as the night sky should restore appropriate dorsal-light-response, allowing insects to fly normally.

Insects have other possible means of correcting their aerial attitude (orientation with respect to gravity). The largest flying insects, such as dragonflies and butterflies, can leverage passive stability to help stay upright<sup>30,31</sup>. However, the small size of most insects means they travel with a lower ratio of inertial to viscous forces (Reynolds number) compared with larger fliers<sup>32</sup>. Consequently, smaller insects, such as flies, cannot glide or use passive stability, yet must still rapidly correct for undesired rotations<sup>33</sup>. Multiple visual and mechanosensory mechanisms contribute to the measurement and correction of undesired rotations, but most measure rotational rate rather than absolute attitude<sup>26,28,32,34</sup>. In environments without artificial light, the brightest portion of the visual environment offers a reliable cue to an insect's current attitude.

To understand the effects of artificial light on insect flight at night, we captured high-resolution flight trajectories across different orders of insects in the presence of artificial lights. This dataset was used to evaluate common models of nocturnal light entrapment, and to establish a novel model, based on the subversion of the DLR. We used point sources, and diffuse illumination in different orientations and collected flight data in broadly two categories: (1) High frame-rate stereo recordings of the flight-paths of wild insects near an artificial light source in field conditions; (2) Captive flight experiments with free-flight body orientations measured with

high-resolution motion capture. Our field experiments with light manipulation qualitatively showed strong dorsal tilting behaviour. The motion capture data allowed us to quantitatively probe the aerial manoeuvres of the insects in free flight around light sources. Extensive analyses on 3D flight trajectories helped evaluate competing models. Finally, we reproduced the flight behaviour of light-entrapped insects by simulating the dorsal tilting control objective, demonstrating that a simple behavioural response could underlie the light entrapment phenomenon.

## Results

### Artificial point light source induces abnormal flight behaviour in insects

Across 413 stereo-videographic field recordings (**Supp. Fig. 1**), we identified three visually evident behavioural motifs as qualitative descriptions of a highly variable behaviour. *Orbiting* could be identified by the relatively stable circular flightpath around the light with sustained speed (**Fig. 1 a & Supp. Video 1**). The insect appeared to maintain a stable banked attitude with the body tilted laterally (rolled) towards the light source. Orbiting was prevalent at low wind condition ( $<1$  m/s), with insects dispersing if a gust of wind arose. *Stalling* was characterised by a steep climb as the insect faced away from the light source (**Fig. 1 b & Supp. Video 2**), losing speed until the insect ceased to make progress. *Inversion* of the insect's attitude (either through roll or pitch) occurred when the insect flew directly over a light source (**Fig. 1 c & Supp. Video 3**), resulting in a steep dive to the ground. Once below the light, insects frequently righted themselves, only to climb above the light and invert once more. During these flights, the insects consistently directed their dorsal axis towards the light source, even if this prevented sustained flight and led to a crash.

### Motion Capture Quantifies Dorsal Tilting Toward Light

To quantitatively understand the behaviour observed in our field recordings, we used insect-scale motion capture in a controlled behavioural arena (**Supp. Fig. 1**). Motion capture in infrared



tracked a custom marker frame (<5% of insect bodyweight) mounted onto the thorax of insect subjects, without disrupting their vision. Three markers arranged in an L-shape allowed us to measure the rotations and translations of the frame in space<sup>35</sup>, and thus the insect's dorsal axis. For this experiment, we tuned the system for data volume with acceptable accuracy (marker residuals <0.24 mm, or <7° absolute orientation error for the smallest insect).

We flew different insect species within a two-metre diameter cylindrical tent around 3 different light sources: a UV LED bulb (395 nm), a UV-Blue Actinic tube, and a cool-white LED bulb, with no other light source salient to the insect. To test diurnal species not generally associated with light-entrapment, we used the Common Darter (*Sympetrum striolatum*) (n=12) and Migrant Hawker (*Aeshna mixta*) (n=2) dragonflies. For nocturnal species, we used the Large Yellow Underwing (*Noctua pronuba*) (n=10) and Lorquin's Atlas Moth (*Attacus lorquinii*) (n=3). Across these four species we recorded 522 continuous flight trajectories (see methods for treatment breakdown).

When flying around a point light source, flights were visibly disturbed as described by the motifs observed in the field (**Supplementary Video 4**). Flight trajectories viewed from above (**Fig. 2 a**) show orbiting around the light, with few direct flights toward the light. We projected the velocity vectors of the 4 species onto the ground plane and compared them to the instantaneous direction of the light (**Fig. 2 b**). In all 4 cases, the velocity vector strongly concentrated orthogonally from the direction of the light source, refuting the idea of flying directly toward the light. In the flight arena, Common Darter dragonflies do not exhibit such orbiting pattern under normal diffused canopy light or in pitch-dark. This demonstrates that *Orbiting* was caused by the UV light source, not the enclosure (**Fig. 2**).

The marker frame data revealed that the insects strongly tilted their backs towards the light source (**Fig. 3**). Examining the dorsal axis projected onto the ground-plane showed the body tilt strongly matched the direction of the light with a 1:1 ratio in all four species (**Fig. 3 a**). Insects were tilting their dorsal axes directly toward the light as they flew around it. We took the dot-

product between the normalized projected dorsal axes and the light source direction as an index: ranging from -1 (away from the light source) and 1 (toward the light source). Our index values for insects flying around a light source were 0.84 (n = 9904 frames) for *S. striolatum*, 0.79 (n = 1416) for *A. mixta*, 0.82 (n = 1563) for *N. pronuba*, and 0.82 (n = 1357) for *A. lorquinii*, indicating strong dorsal tilting towards the light in each species. In contrast, with the light off, *S. striolatum* had a tilting direction index of 0.17 (n = 713), indicating weak dorsal tilting consistency in darkness.

We further explored the light-disturbed flight attitude distribution of the four species by plotting their relative roll and pitch (**Fig. 3 b**). To compare this to the undisturbed flights, we flew dragonflies under bright, broad-spectrum lamps illuminating the arena from the ceiling. For the two moth species, we used a single actinic tube to produce a diffuse UV-Blue ceiling, while keeping overall light-levels low. Under control conditions, all four species showed typical cruising level flight distribution with body roll angle below 30° (roll medians ± interquartile range: 13.9° ± 22.7° for *N. pronuba*, 11.9 ± 14.8° for *S. striolatum*, 20.2 ± 21.4° for *A. mixta*, and 8.7° ± 11.2° for *A. lorquinii*), with most variation in pitch as required by routine manoeuvres such as turning, climbing, or descending. The roll-pitch distributions of all species near a point light source differed considerably from their controls. *S. striolatum* and *N. pronuba* showed strong and high roll near point sources. The larger *A. mixta* and *A. lorquinii* showed less consistent body attitude but still shifted their roll-pitch distribution to higher values when near a point light source. All species showed some degree of higher roll when near a point light source (roll medians ± interquartile range: 48.0° ± 30.7° for *N. pronuba*, 43.7 ± 39.2° for *S. striolatum*, 29.3 ± 30.7° for *A. mixta*, and 30.6° ± 31.8° for *A. lorquinii*). This data suggests that a point light source significantly alters attitude control, as the insects attempt to align their dorsal axis toward the light.

### **Sky-like artificial light restores normal flight**

An established method for light-trapping insects involves shining a bright light onto a white sheet<sup>36</sup>. In the field, we filmed a shrouded UV light source facing downward (the bulb concealed above) onto a white fabric sheet spread across the ground. In these recordings, we observed insects inverting, and tumbling in the air before crashing into the ground (**Fig. 4 a**). If this trapping effect is mediated by the DLR, we expect insects not to be trapped by otherwise similar light sources that match naturalistic cues. When we used the same shrouded UV bulb to shine upward onto a white sheet stretched above, it created a corridor in which UV-Blue light reflected down as a diffuse canopy similar to the sky. In this arrangement, insects did not fly upward toward the bulb, or cluster around the light, but rather flew various paths under the light through the canopied corridor (**Fig. 4 b**), supporting the notion that crashing behaviour is a consequence of a mismatch between the insects' sense of upward and the true direction of gravity (**Fig. 4 c**).

To test whether smaller insects may be more resilient to the manipulation of the dorsal light response, we caught wild honeybees (*Apis mellifera*) and mixed Diptera (Identified only to genus level, including *Lucilia*, *Dolichopus*, *Coenosia*, among predominantly Anthomyiidae and Muscidae). We placed subjects in a clear Perspex cuboid tank (20 cm on each side) for high-speed filming. With diffuse UV light from above, both honeybees and mixed Diptera flew upward towards the ceiling of the enclosure in a rapid but stable manner, resembling normal escape flight. However, with UV light from below, neither bees nor flies were able to maintain flight, tilting and inverting soon after take-off and crashing into the floor (**Fig. 4 d**). These results indicate smaller insects also heavily rely on the direction of light to determine the upward direction in flight, and that specific sensory organs such as dipteran halteres do not compensate for inaccurate estimation of verticality. All flies were also tested with cool-white LED bulbs above and below their tank. No flies exhibit the tipping and crashing behaviour over the white source, suggesting the effect is specific to short wavelengths of light in Diptera tested.

Our qualitative observation that normal flight occurs under a diffuse canopy (**Fig. 4 b**) can be confirmed by some quantitative measures. The total path tortuosity (total path length divided by

distance travelled) for trajectories near light was higher (median 3.21,  $n = 56$ ) around a point source than under a diffuse canopy (median 1.21,  $n = 56$ ) (Wilcoxon rank sum  $Z = 6.32$ ,  $p < 0.001$ ) (**Fig. 5 a**). Insects flying near point light sources tended to travel orthogonally to the light, an effect mostly absent under diffuse canopy (**Fig. 5 b**). Finally, we tested for a light-centric turning bias when the light source was to the left or the right of the insect's velocity (within  $30^\circ$  of orthogonality when projected onto the ground-plane). Near a point light source, recorded insects preferentially turned toward the light, as expected for a flight attitude in which they were tilted toward the light (**Fig. 5 c**). This turning bias was absent under a diffuse canopy.

### **Simulated dorsal tilting is sufficient to produce light entrapment**

In simulation, we tested whether patterns observed under field and laboratory settings could have emerged from the proposed DLR mechanism alone. Due to anatomical constraints for flapping flight, flying animals often produce a net aerodynamic acceleration in a relatively constant orientation with respect to their body<sup>37</sup>. As a result, flying animals typically tilt their body to change direction, with the exception during slow-flight manoeuvres (e.g. hovering)<sup>33</sup>. By reconstructing the aerodynamic acceleration (accounting for gravity) from our motion capture data, we found that the net acceleration vectors clustered within a narrow range forward and dorsal with respect to the insect's thorax (**Supp. Fig. 2**).

Our agent-based simulations used a fixed acceleration vector relative to the insect's body axes (**Fig. 6 a**). Maintaining flight requires the total lift to match or exceed gravity, and the forward component to counteract drag for the speed of travel. We used a linear proportional controller to construct this phenomenological model (see Methods for details). There were four free parameters –  $k_1$ : the gain of dorsal tilting toward the light source,  $k_2$ : the gain of corrective dorsal tilting toward true vertical,  $k_3$ : the gain of stabilising the body axis towards the velocity vector, and  $v_t$ : the terminal velocity of the insect acting as an index of drag magnitude.

Each of the three behavioural motifs (**Fig. 1**) were replicated in simulation by the same model given different initial conditions. With appropriate entry, the simulated insect developed an

orbiting flightpath around the light with a stable flight speed over multiple seconds (**Fig. 6 b**). Stalling was recreated by initiating the agent and flying away from the light source, with a steep light-induced climb and reduction in flight speed (**Fig. 6 c**). Finally, when the agent's entry was initiated above the light source, it inverted its flight and entered a dive with rapidly increasing speed (**Fig. 6 d**).

While the three motifs were generated through parameter tuning, the model assumption of light-induced dorsal tilting could readily induce light entrapment without specific tuning. We ran 300 five-second simulations with randomised parameters and starting positions (**Fig. 6 e**). The majority of the simulated trajectories showed light entrapment via maintained or decreasing range from the light source. Removing the light-induced dorsal tilting (equivalent to turning the light off) showed the dispersal from the light source (**Fig. 6 f**). We quantified dispersal under both conditions by measuring the average change in range to the light for the last 3 seconds of each simulation. Dorsal tilting models had a median range change of -0.06 m/s, not statistically different from 0 (Wilcoxon signed rank test  $Z = 0.76$ ,  $p = 0.45$ ), demonstrating that the agents did not escape from the light. Models without dorsal tilting had a median range change of 1.85 m/s, demonstrating dispersal away from the light (Wilcoxon signed rank test  $Z = 14.42$ ,  $p < 0.001$ ). As in experiments, average velocity direction of the simulated dorsal tilting models was orthogonal to the light, highlighting entrapment by a circuitous rather than direct path (**Fig. 6 g**). Our model demonstrates that dorsal tilting is sufficient to generate flight paths that we observed in light entrapment.

We altered our simulation such that light response controller maintained the light at a fixed, but arbitrary, egocentric position (rather than purely dorsally). This model then represented a celestial compass that had been corrupted by the proximity of an artificial light source (**Supp. Fig. 3**). Across 300 five-second random parameter simulations, the trajectories were a poor match to our observations of real animals. While some animals did spiral in toward the light source, trajectories lacked the consistent orthogonal-to-light trajectories observed in both real

insects, and in the DLR simulations. Celestial compass simulations had a median range change of -1.75 m/s, demonstrating that agents escaped from the light (Wilcoxon signed rank test  $Z = 14.08$ ,  $p < 0.001$ ).

# **Flight path manipulation via light switching**

A corrupted compass cue could also result in insects travelling circularly around the light source (or more accurately in logarithmic spirals)<sup>8,19,38</sup>. To conclusively differentiate our flight control reflex hypothesis from the classic compass navigation theory, we toggled between two different point UV light sources while wild moths (*N. pronuba*,  $n = 3$ ) were entrapped beneath either light source (**Supp. Fig. 4**). Moths entrapped by confusion of a celestial compass would endeavour to keep the perceived celestial object in the same relative position (left or right). However, we found moths orbiting a light in one direction (e.g., clockwise) readily changed their side facing the light (swapped to anticlockwise) when we toggled light sources. Dorsal tilting explains this rapid direction switching through body roll adjustment, which lacks the implicit L:R side bias of compass navigation.

# **Exceptions to the light-entrapment behaviours**

Some tested insect species seemed immune to light entrapment. Under laboratory conditions, none of the three Oleander Hawkmoths (*Daphnis nerii*) tested demonstrated light-orienting behaviour across 71 recorded trajectories. The hawkmoths flew directly above upward-facing UV and white LED bulbs without inverting their attitude or orbiting the lights (**Supplementary Video 5**). The paths of *D. nerii* near the light lacked the orthogonal tendency seen in the other species (**Supp. Fig 5**). The dorsal tilting index for *D. nerii* was 0.24 ( $n = 911$ ), scarcely greater than that of *S. striolatum* in the dark. In general, *D. nerii* maintained a more level body attitude without the extreme rolls and pitches seen in other species around a point light source (**Supp. Fig 5**). Wild caught vinegar flies (*Drosophila* spp.) were another exception and showed no distinctive difference between flight above or below a UV or white LED light

source (**Supp. Fig 5**). These exceptions suggest that, in addition to the wavelength specificity, there are also species differences in this behaviour. Some species might not strongly rely on the light to correct their aerial attitude relative to the gravity.

## Discussion

Our results, the first 3D flight trajectories of insects entrapped by artificial light, address the long-standing question of why insects aggregate around light at night and seem unable to leave. We found that at short ranges most insects do not fly directly to a light source, but orthogonally to it, leading to orbiting, stalls, and even inverted flights. Field data suggest that insects orient their dorsal axes towards light sources, and we confirmed this with insect motion-capture recordings in the laboratory. We propose a behavioural reflex model based on the well-documented dorsal light response of insects<sup>26</sup>, arguing that a nearby artificial light source shifts an insect's sense of vertical orientation, disrupting its ability to maintain forward flight. Our experimental evidence and simulations attribute the mechanism of light entrapment to a disruption of the insect's perception of vertical rather than a navigational cue. We discuss implications for this paradigm shift from navigation to control below.

## The Moon and Alternative Explanations

We can now evaluate the previously suggested models with our experimental results. (1) Insects do not appear drawn to light as through an escape response<sup>7</sup>. In both field and lab conditions, insects rarely head directly towards, but consistently fly orthogonal to the light source. This refutes the fundamental premise of an escape response. (2) The confusion of a celestial compass by the light does not match our results either<sup>8</sup>. An insect should keep a light source at a fixed visual location for maintaining its heading. Switching light position (**Supp. Fig. 4**) shows that insects readily hold the light source on either side of the body. We also do not observe logarithmic spirals toward the centre of the light source, a key prediction of celestial compass entrapment. A corrupted celestial compass cue also cannot explain why insects stall

or invert themselves while flying over light sources.<sup>8</sup> (3) Heat radiation as an attractive component is refuted by the effect of LED lighting, which supplies negligible infrared radiation yet still entraps vast numbers of insects<sup>9,39</sup>. (4) Finally, the predictable light-centric flight trajectory motifs we elicited argue against insects being blinded by light<sup>10,11</sup>. Ultimately, we consider the dorsal-light-response the most parsimonious explanation of insect light entrapment. It is a basal sensory mechanism, thus explains the high prevalence of light attraction across a wide range of insects both diurnal and nocturnal.

### **Some insects appear less affected by artificial light**

Among the insects we tested, only Vinegar Flies (*Drosophila* spp.) and Oleander Hawkmoths (*Daphnis nerii*) flew undisrupted over upward-facing ultraviolet light, but it is unclear why. Curiously, artificial illumination in the field readily entraps Oleander and other hawkmoths<sup>40</sup>. Additionally, there is evidence of older hawkmoths foraging while ignoring bright artificial lights<sup>41</sup>. This implies state mediated DLR suppression, or specific wavelength tuning across species.

The brightest visual region may be an overriding cue, but not the only cue for vertical orientation. During slow hovering flights, any mass hanging on the insect's body (such as legs) can indicate the gravity direction. However, gravity sensing via this method would be challenging during high-acceleration manoeuvres<sup>28</sup>. Combining optic flow cues and body rotation rate measurements may also enable an estimation of the gravity direction, as demonstrated in robotics<sup>42</sup>.

Insects must also be able to fly when the zenith is not the brightest region, such as at dawn, on a forest edge, or when the moon is low in the sky<sup>43</sup>. Dorsal tilting towards the discrete natural light sources could lead to banked steering similar to that found around artificial light sources. One factor may be that insects adjust for the discontinuous brightness in the natural environment by local visual adaptation<sup>44</sup>. Another possibility is that coarser visual processing systems ignore or dilute distant sources like the moon but fail with nearby point sources. In some species, the DLR has two components, mediated separately by the insects' compound



eyes and by the ocelli<sup>28</sup>. Future work on the integration and luminance thresholds of these two components across multiple species would allow for a better understanding of when artificial light destabilises nocturnal insects. Non-visual mechanisms like passive stability in insects capable of gliding should also help maintain a correct flight attitude without the requirement of sensory feedback, suggesting potential effects of body size on light entrapment<sup>45</sup>.

### **Long distance attraction to light**

We did not test the interaction between range and attraction, although other studies considered this in other contexts<sup>46–48</sup>. Other mechanisms might contribute to the arrival of insects at nocturnal light sources over longer ranges. For instance, insects do use celestial compasses for nocturnal navigation, and artificial light sources may interfere with these heading cues<sup>8,49</sup>. But even at long distances artificial light sources often remain brighter than the night sky and may cause dorsal tilting that would also steer an insect towards a light source. Only one experiment has tracked moth trajectories to lights over long distances, and found only 2 of 50 individuals released ended their flight at a light source 85m away<sup>50</sup>. This and our results suggest artificial lights may only trap passing insects rather than attract them directly from farther away.

Our findings suggest this light entrapment of insects at a local scale is due to a corruption of the insect's attitude control, rather than navigation. The DLR is a basal mechanism which enables vertical orientation. Bright nearby lights can disrupt this mechanism and cause unintentional course alterations in insect flight. Taken together, reducing bright, unshielded, and upward facing lights will mitigate the impact on flying insects at night, when skylight cannot compete with artificial sources. Future research focussed on spectral tuning of the visual components of the DLR would help isolate how best to alter artificial lights to avoid confusing insects flying at night.

## **Supplementary Methods**

### **Animal Husbandry**

The insects we used in lab experiments were either field caught (Large Yellow underwing, *Noctua pronuba*, Common Darer, *Sympetrum striolatum*, Migrant Hawker, *Aeshna mixta*) or reared from purchased pupae (Atlas Moth *Attacus lorquinii*, and Oleander Hawkmoth *Daphnis nerii*). All insects were kept on a 16 - 8 hour light-dark cycle within a dedicated rearing tent at 24 °C and 65% humidity. Moths that fed as adults (not Saturniidae) were provided with halved organic bananas. Dragonflies were hand fed adult *Drosophila* spp.

### **Artificial Lighting**

We provided experimental illumination by three alternative bulb types. The first was a blue-UV tube light common to insect light traps (Philips 15w TL-D Actinic). The second a UV LED bulb (TBE Lighting L276, 9w). Finally, we used a cold white LED light source (QNINE B22-G45 6000k, 6w). These lights were chosen to reflect a range of light spectrum that causes light entrapment in insects. However, we did not systematically pursue the effects of wavelength in this work. None of our light sources were strongly polarised, negating any effects of attraction towards polarised light found in some insects<sup>51</sup>.

### **Field Stereo Videography Recordings**

We made field recordings (**Supp. Fig. 1, Supp. Table 1**) in Monteverde, Costa Rica, under permit numbers M-P-SINAC-PNI-ACAT-024-2020 and R-SINAC-ACG-PI-016-2022 issued by SINAC (National System of Conservation Areas). We used a pair of monochrome shutter-synchronised Fastec TS3 high speed cameras mounted on a single tripod cross-arm. Most videos were shot at 500 fps, giving a good temporal resolution in flight behaviour. These cameras permitted us to film with infrared illumination, which we assumed invisible to the insect

eyes. Consistent with this assumption, we did not observe any insects crashing into, nor interacting with our IR lights (Larsen wide angle IR Illuminators; 850nm). We configured the IR lighting to create high contrast for flying insects against the dark night background. To provide stereo calibration, we waved a known-sized checkerboard through the overlapping views of both cameras. We could then use inbuilt MATLAB functions to both detect the checkerboards in the views of both cameras and estimate the extrinsic parameters (relative camera orientation and translation). Within our field recordings, we were unable to identify many insects below order-level with certainty.

## **Insect Marking for Motion Capture in the Laboratory**

Our motion capture system relies on retroreflective markers affixed to the recording subject (**Supp. Fig. 1, Supp. Table 2**). To mass produce retroreflective marker frames (3 markers per frame), we used a stereolithographic 3D printer (Formlabs Form 3). We then added small (1 mm<sup>2</sup>) sections of adhesive retroreflective tape (Qualisys) to the spherical markers. The resulting photopolymeric resin marker frames were slightly heavier than the carbon frames we used previously<sup>30</sup> (10 - 20 mg per marker set), but with much reduced fabrication time. For the flight behaviour of this study, this weight still had minimal impact on the flight at ~5% of bodyweight for our lightest insects (*S. striolatum* at ~300 mg). After the subjects were immobilised on ice, we attached a marker frame to the dorsal surface of the thorax using a minimal amount of UV curable glue (Loctite 4305). A custom UV LED pen with a small light window (3mm) was used to cure the glue locally to minimise any risk of damaging the insect's vision. All insects recovered in the behavioural tent for 20 minutes before we began recordings. We found no visible behavioural differences between the marked and unmarked insects, suggesting that the marker frame did not impact the general flight control.

## **Motion Capture Behavioural Recordings**

We used eight Qualisys Marqus M5 motion capture cameras (4 pairs) arrayed around a steel ring (diameter 1.66 m) (**Supp. Fig. 1**). This was held on a vertically movable metal frame (2.4 x 2.4 m) suspended from the ceiling and both raised and lowered by a central winch. We used blackout curtains to prevent stray light (e.g., computer screens) in the laboratory from affecting our results. From this same frame hung a white cylindrical tent (diameter 2 m, height 2.4 m) with the cameras poking through portholes near the ceiling. Lights were hung in the middle of the tent 1 m above the floor, allowing insects to fly freely around them. Flights were either spontaneous, or manually elicited by brushing the insect's abdomen. Multiple flights occurred within the same recording, and each recording ran for a maximum of 30 minutes. During these recordings, the insect was free to leave the cameras' view, and then return. We optimised the motion capture recordings to maximise the covered volume and recording length. This configuration provided a tracking residual  $\sim 0.24$  mm at 240 fps (**Supp. Fig. 1**).

## **Field Data Processing**

Our field data were more variable than the laboratory data, and some videos did not yield usable trajectories. One major disturbance was the wind. We chose filming sites that were sheltered from the wind as suggested by an anemometer, and tried to record when the wind speed was under 1 m/s. However, airspeed relative to the ground varies widely over both time and space at a scale relevant for the recordings. Thus, we could not estimate the true airspeed of the insects with high certainty. Smaller insects are likely to be more affected by airflow due to their lower mass and slower flight speeds. Even low wind velocities may have impacted the flight patterns we observed in the field. In any case, we processed all flight trajectories that were resolvable and not visibly impacted by the wind.

Another source of field data variation was image digitisation error. Our data processing pipeline was developed for insects with high IR reflectivity, thus insects which reflected less IR were difficult to track. For example, the dorsal light response was robustly discernible in clear wing butterflies, however the transparent wings made accurate digitisation impossible. Similarly, most of the insect individuals visibly present at our light were small ( $<1$  cm body length) yet in our data the mean insect size was  $29 \text{ mm} \pm 9 \text{ mm}$  (estimated via angular size and distance from the cameras). This bias towards larger insects was due to IR reflection visibility in the recorded footage.

We created three custom MATLAB apps to assist with the digitisation and triangulation of field data, their function was as follows: (1) Identify and label the beginnings of trajectories (start indexes) in both camera views, obtaining the start frame and position of multiple trackable paths within a single set of paired videos. (2) Import both videos and the trajectory start indexes. Then build a smoothed spline by scrubbing through the video and adding position nodes on the tracked insect's location (every 50 - 100 frames). Tracking could then be applied by subtracting an averaged background frame (obtained from 20 linearly spaced frames throughout each video) from each frame along the insect's track. On each frame, the app created a search box around the interpolated spline and searched the binarized subtracted image, locating the focal insect by its proximity to the tracking spline. The light source, if there was one, was also digitised within this app. (3) Finally, the raw position measurement of the insect was triangulated from the tracked insect centroids and the recorded calibration for that selection of videos. The nature of the tracking meant that high-frequency oscillations were created by the centroid focussing on the wings of the tracked insect, these were counteracted by fitting a cubic smoothing spline through the obtained track. We used a smoothing constant that maintained the course of the insect within the bounds of the oscillations created by the wingbeats to avoid over-smoothing. This gave a smooth estimation of the position and velocity of the insect during its flight.

## **Motion Capture Data Processing**

Motion captured markers were labelled in the proprietary Qualisys Track Manager software and then exported directly into MATLAB structures. Markers were identified by their asymmetric placement, but secondarily filtered based on their known distance to other markers. Two quality filters were applied to the tracked data to ensure accuracy. (1) If the distance between the markers on either arm of the frame exceeded 0.4 mm of the median length (10% of the length of the shortest marker arms) or (2) the angle between the arms differed by  $> 5^\circ$  from the median ( $\sim 90^\circ$ ), the frame was removed from the trajectory. These instances reflected either poor tracking or accidental mislabelling.

Recordings of up to 30 minutes consisted of many smaller sections with variable marker visibility. Individual trajectories were excised if the marker frame was not visible for longer than 0.5 seconds. This kept closely time-linked trajectories together despite small gaps but separated different bouts of flight around the light. When analysing the data, we used separate flags to distinguish 6 DoF data (in which all three markers of the rigid-frame were tracked) from 3 DoF data in which only one marker needed to be visible. While we required 6 DoF data to distinguish orientation of the insect, we could still use 3 DoF data to demonstrate flight speed and the position of the insect around the light. Given that insects would frequently settle on the light or walls and walk around at low speeds, we filtered out any data below  $0.3 \text{ ms}^{-1}$  to avoid including data in which the insects were not in flight.

## **Laboratory Video Recordings**

To test the effects of artificial light on smaller insects than those used in our motion capture recordings, we caught Honeybees (*Apis mellifera*) and an assortment of Diptera from the grounds of Imperial College London. All these captive insects were recorded in experiments within 1 hour of capture. We also, we collected *Drosophila* spp. from a local compost heap,

using them within 48 hours of capture. *Drosophila* spp. were given small sections of banana on which to feed before recordings were made.

We contained these insects within a Perspex-sided cube 20 cm on a side (**Fig. 4 d**). A small portion of damp cartridge paper in one corner of the box provided sufficient humidity that most tested insects survived the experiments and were able to be released afterward. On one side of the cube, we placed two infrared LED panels facing through the centre of the box (850 nm Splenssy 96 LED array). The closest wall of the cube was covered in thin paper, diffusing the transmission of the infra-red light to create a near-even backdrop against which insects could be silhouetted. We placed UV (TBE Lighting L276, 9w) or white LED bulbs (QNINE B22-G45 6000k, 6w) above and below the cube, having independent control of each via toggle switches. We positioned a high-speed camera (Phantom v211, Vision Research, with 50 mm Nikon F-mount lens) to look through one wall of the cube at the diffuse infra-red illumination. We recorded the flight behaviour at 1000 fps. Switching between the lights caused insects to congregate either at the top of the container (when the light came from above) or at the bottom (when light came from below). Periodically switching between the lights was generally sufficient to elicit flight responses. We also found lightly tapping the box a reliable method for generating flight recordings, especially in *Drosophila* spp. who did not congregate around the light source.

## Light Switching

For our light switching experiments, we hung two UV LED lights (TBE Lighting L276, 9w) from a metal frame (3 m tall) outdoors in Cambridge, UK (**Supp. Fig. 4**). The lights were thus suspended 2 metres from the ground. We arranged a single high-speed camera (Chronos 2.1, Kron Technologies, with IR filter removed) facing directly upward beneath the lights. Either side of the camera we arranged two IR illuminators (850 nm Splenssy 96 LED array) facing upward, which picked out flying insects against the dark sky above. We recorded behaviour at 500 fps.

We switched on one of the lights and waited for wild moths (invariably *N. pronuba*) to begin orbiting behaviour. When a moth was orbiting beneath one of the lights, we swapped to the other light using a manually toggled switch. After a short interval (<5 s) we manually triggered the camera and saved the video.

## Data Analysis

All behavioural kinematics and analyses were produced in MATLAB 2021a (MathWorks) using custom scripts. Example scripts are provided along with the flight data themselves.

## Simulating Dorsal Tilting

To mimic the dorsal turning responses, we introduced a proportional controller that pulled the dorsal axis of our simulated insect towards the direction of the light source (**Fig. 6 a**). The proportional controller caused the insect's body to rotate with an angular speed proportional to the error between the dorsal axis and the line-of-sight (LOS) vector to the light source. We termed the gain on this controller  $k_1$ , in units of  $s^{-1}$ . We did not attempt to capture realistic flight dynamics but merely to provide the first approximation of the observed dorsal tilting phenomenon. We implemented a second controller to pull the dorsal axis back towards the true vertical with a gain  $k_2$ . This stabilising controller represented active and passive mechanisms in the insect's flight system that may orient the insect right-side-up. We included this since insects can retain some level of body attitude even in total darkness. Finally, we introduced a third controller that pulled the longitudinal body axis of the insect towards its velocity vector. This accounts for the active and passive effects of an insect's body tending to remain head-on to its direction of travel. Thus, the planar formulation of the steering embodied by the simulated insect is given by:

$$\dot{\gamma} = k_1\theta + k_2\gamma + k_3\beta$$



Where  $\dot{\gamma}$  is the summed steering response of the insect.  $\theta$  is the angle between dorsal axis and the LOS to the light,  $\gamma$  is the angle between the dorsal axis and vertical, and  $\beta$  is the angle between the body axis and the velocity.  $k_1$ ,  $k_2$ , and  $k_3$  are the respective proportionality constants for the summed steering responses.

## Drag

The aerodynamic drag for flapping insects depends on multiple influences, including speed, wing posture, and body orientation amongst other factors. Here, we adopted a simplistic quadratic air drag model with a form factor  $c$ . This constant could be determined by setting the terminal velocity achieved by an insect in freefall. Varying the terminal velocity of the simulated agents allowed for the characterisation of insects of differing sizes.

Where  $c$  is a constant reflecting the deceleration due to drag for a given airspeed,  $g$  is gravitational acceleration (scalar), and  $v_t$  is the insect's terminal velocity (scalar). Within our simulations of the three behavioural motifs, we used a constant of  $0.80 \text{ s}^{-1}$ . During random gain simulations, we set the constant between  $0.09 \text{ s}^{-1}$  and  $39.24 \text{ s}^{-1}$  (terminal velocity between  $10.5$  and  $0.5 \text{ m/s}^2$  respectively).

$$c = \frac{g}{v_t^2}$$

## Kinematics

Simulations were run on a discrete time interval basis, with the evolution of the flightpath being governed by the following set of equations. Firstly:

$$a_b = |a_{forw.}| \widehat{b_x} + |a_{dors.}| \widehat{b_z}$$

Where  $a_b$  is the acceleration generated by the model insect.  $a_{forw.}$  and  $a_{dors.}$  are the forward and dorsal components of the generated acceleration, and  $b_x$  and  $b_z$  are the x and z axes of the

insect's body. The hat notation over the vectors denotes unit vectors. The insect's body rotates based on the controller described in the 'Dorsal Tilting' Section. This acceleration is then combined with gravity and drag to create the net acceleration.

$$a_{net}(t) = g - \hat{v}(t-1)(c|v(t-1)|^2) + a_B(t)$$

Where  $a_{net}$  is the net acceleration on the simulated insect's body.  $g$  is gravitational acceleration,  $c$  is the drag constant, and  $v$  is the velocity vector of the simulated insect. This net acceleration is then added to the body kinematics as follows:

$$v(t) = v(t-1) + a_{net}(t)dt$$

$$p(t) = p(t-1) + v(t)dt$$

Where  $p$  is the position of the simulated insect and  $dt$  is the elapsed time between iterations.

## Flight Simulations

There are 4 model parameters to set in the simulation. To recreate example motifs observed in nature, we chose the following parameters:  $k_1 = 15 \text{ s}^{-1}$ ,  $k_2 = 1 \text{ s}^{-1}$ ,  $k_3 = 15 \text{ s}^{-1}$ ,  $v_t = 3.5 \text{ ms}^{-1}$ . The forward component of acceleration was  $5 \text{ ms}^{-2}$  and the dorsal component was  $15 \text{ ms}^{-2}$ . For these examples, the  $\Delta t$  per iteration was kept at 10ms. These initial conditions were chosen to reflect an insect flying at a relatively low Reynolds number (low terminal velocity), rapid aerial mobility ( $k$  values), and with lift and thrust profiles like those observed in our measured data (Supp. Fig. 2).

To avoid conclusions drawn from a well-tuned combination of parameters, we initiated 300 simulations with randomly assigned parameters within reasonable ranges. The ranges were as follows:  $0 \text{ s}^{-1} < k_1 < 20 \text{ s}^{-1}$ ,  $0 \text{ s}^{-1} < k_2 < 20 \text{ s}^{-1}$ ,  $k_3 = 15 \text{ s}^{-1}$ ,  $0.5 \text{ ms}^{-1} < v_t < 10.5 \text{ ms}^{-1}$ ,  $0 \text{ ms}^{-2} < a_{\text{forw.}} < 10 \text{ ms}^{-2}$ ,  $9.81 \text{ ms}^{-2} < a_{\text{dors.}} < 24.81 \text{ ms}^{-2}$ . We determined starting positions at random within the

cube defined by +/- 5m of the light source along each of 3 spatial axes. Initial headings were parallel to the ground plane but started at a random horizontal bearing. Although interactions over the full parameter set are outside the scope of this work, we found the agents in most simulations were entrapped, drawn closer to the light with many entering a stable orbit.

Additionally, we adapted our flight simulations to match the assumption of a corrupted celestial compass. This model used the same structure as our dorsal tilting model, but with the light response component of the controller attempting to maintain the light at a fixed egocentric direction (rather than over the dorsum). This arbitrary direction was set by the initial direction of the line-of-sight to the light source, from an egocentric perspective. All other components of the simulation were kept the same as previously discussed.

## **Data Availability**

Associated data and example scripts have been made available via Figshare with the submission of this manuscript.

## **Author Contributions**

SF: conceptualization, methodology, data gathering, software, visualisation, writing—original draft, data curation, formal analysis, project administration, fieldwork funding acquisition

YS: conceptualisation, methodology, data gathering, writing-original draft, data curation, project administration, fieldwork funding acquisition

JT: project supervision, visualisation, analysis validation, writing- review and editing, project administration, funding-acquisition

HTL: project supervision, simulation advising, analysis validation, writing- review and editing,  
project administration, funding-acquisition

PA: fieldwork support, writing-review and editing, project administration

## **Acknowledgements**

We thank the CIEE Monteverde staff for logistical support and Marvin Hidalgo for logistical support at The Monteverde Biological Station. We thank Enrique Castro for assistance with permits. Tim Brandt for help troubleshooting the hi-speed camera setup. We thank the staff members of the Institute of Environment and the Kimberly Green Latin American and Caribbean Center for help with logistics and grant management. Dr. Alexander Yarger for discussion and feedback on the results. Dr. Akito Kawahara, Dr. Andrew Biewener, Dr. Aso Yoshi and Dr. Holger Krapp, for feedback and comments on the manuscript. We thank Labonte Lab for use of their Form 3 SLA printer. We would like to thank Dr. Eleanor Miller for assistance obtaining research subjects.

## **Funding**

Financial support was provided by European Research Council (ERC-StG No.804315 to HTL), National Science Foundation (NSF IOS-1750833 to JCT). Additionally, YS received support from a DYF award from the FIU Graduate School. Fieldwork was supported by the following: a Tropical Conservation Grant from the Susan Levine foundation, a National Geographic Explorer Grant (EC-82941R-21), a Lewis Clark Exploration Grant from the American Philosophical Society, and a Tinker Field Research Collaborative Grant.

## **Competing interests.**

We declare no competing interests



## Figures & Legends

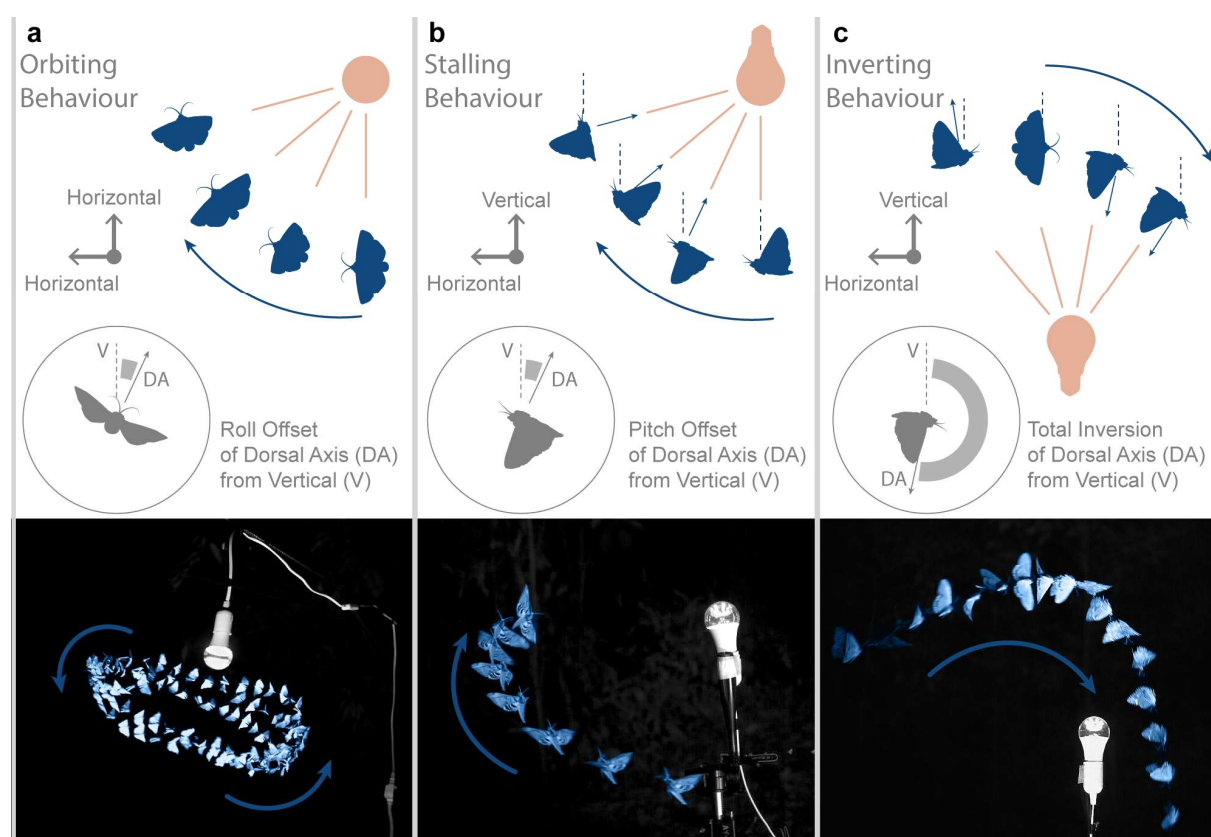

**Figure 1:** Insects flying around a light source in the field display 3 common behavioural motifs not seen in normal flight: **a** Orbiting, **b** Stalling, and **c** Inverting. (Above) Diagrammatic representations of the three behavioural motifs. (Below) Overlaid flight trajectories of insects performing these characteristic patterns around UV light sources. Overlaid frames are separated by aesthetically chosen fixed intervals of 52 ms (left), 20 ms (middle), and 24 ms (right) for visualization.

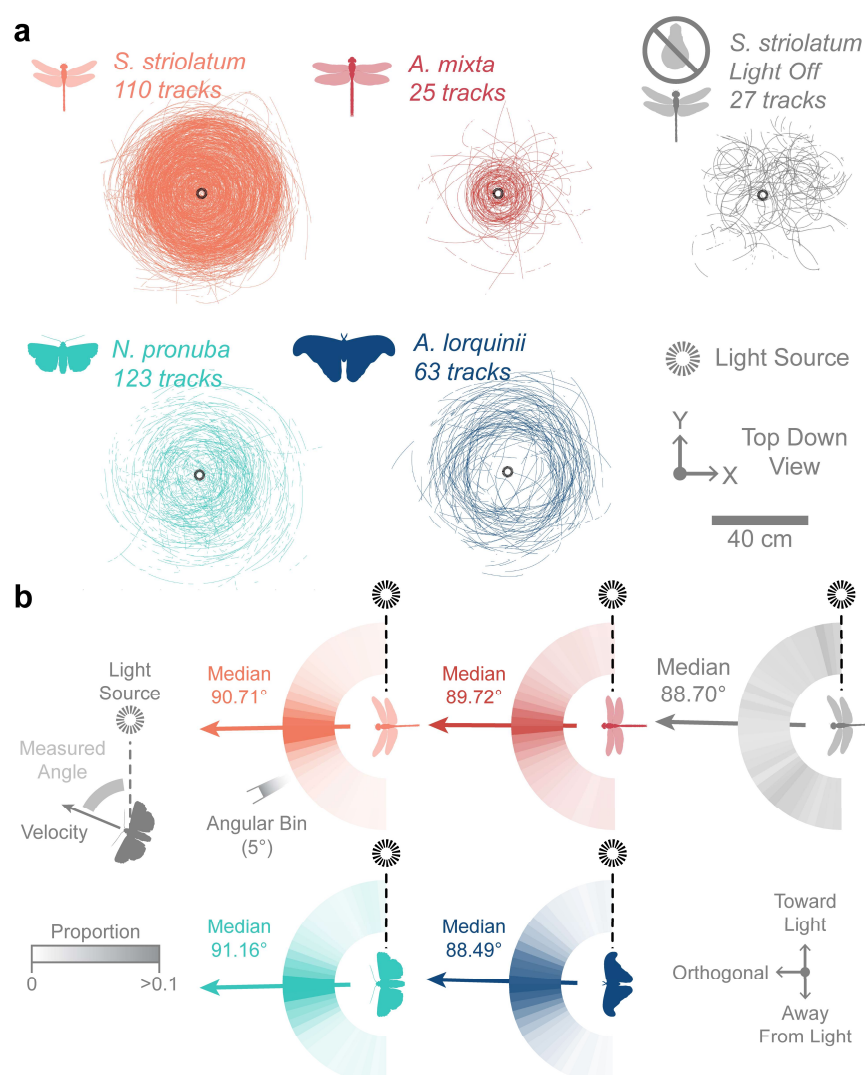

**Figure 2:** Insects within a controlled environment did not head towards the light source, but predominantly orbited it. **a**, Top-down plotted flight tracks for each of the 4 main study species with a central light source (*left four panels*), and *Sympetrum striolatum* with the light off (*right*). **b**, The horizontal orientation of insect velocity relative to the light source is given by a radial histogram in which count proportion is colour coded within each 5° bin.

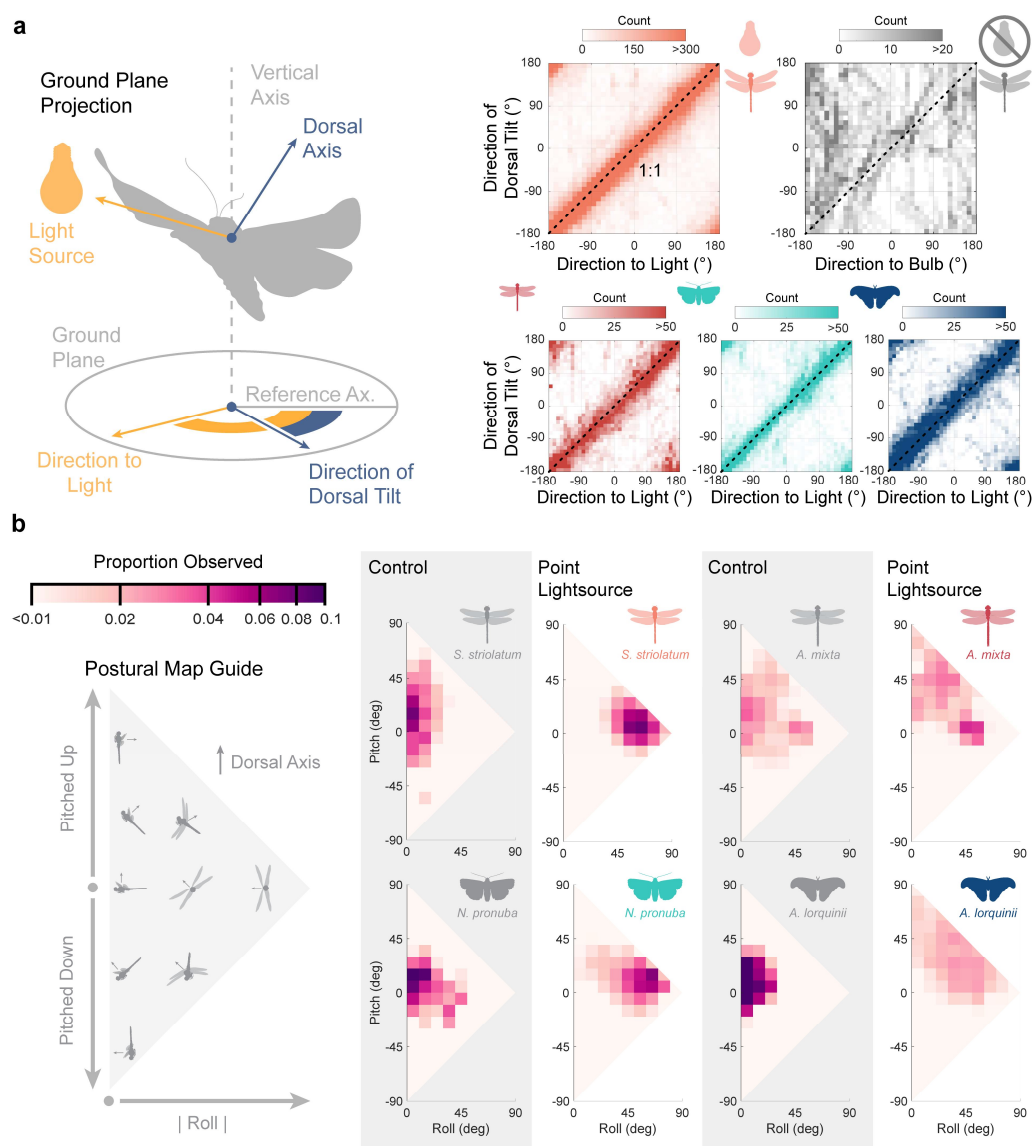

**Figure 3:** Motion capture of the flying insects demonstrated that the animals maintain a consistent tilt of their dorsum towards the direction of the light. **a**, (Left) The insect's dorsal axis is projected onto the ground plane to compare with the light source direction. The reference axis is a global orientation reference. (Right) The direction of dorsal tilt is plotted against the direction to light. Dashed line shows a gradient of 1. Insects flying around a point source of light maintained extreme roll and pitch attitudes, as compared to animals flying under control conditions. **b**, The relative body pitch and magnitude of roll are plotted on a 2D distribution map.



618 For each species, in-flight roll-pitch distribution under control conditions and near a point light  
619 source are presented on the left and right respectively.

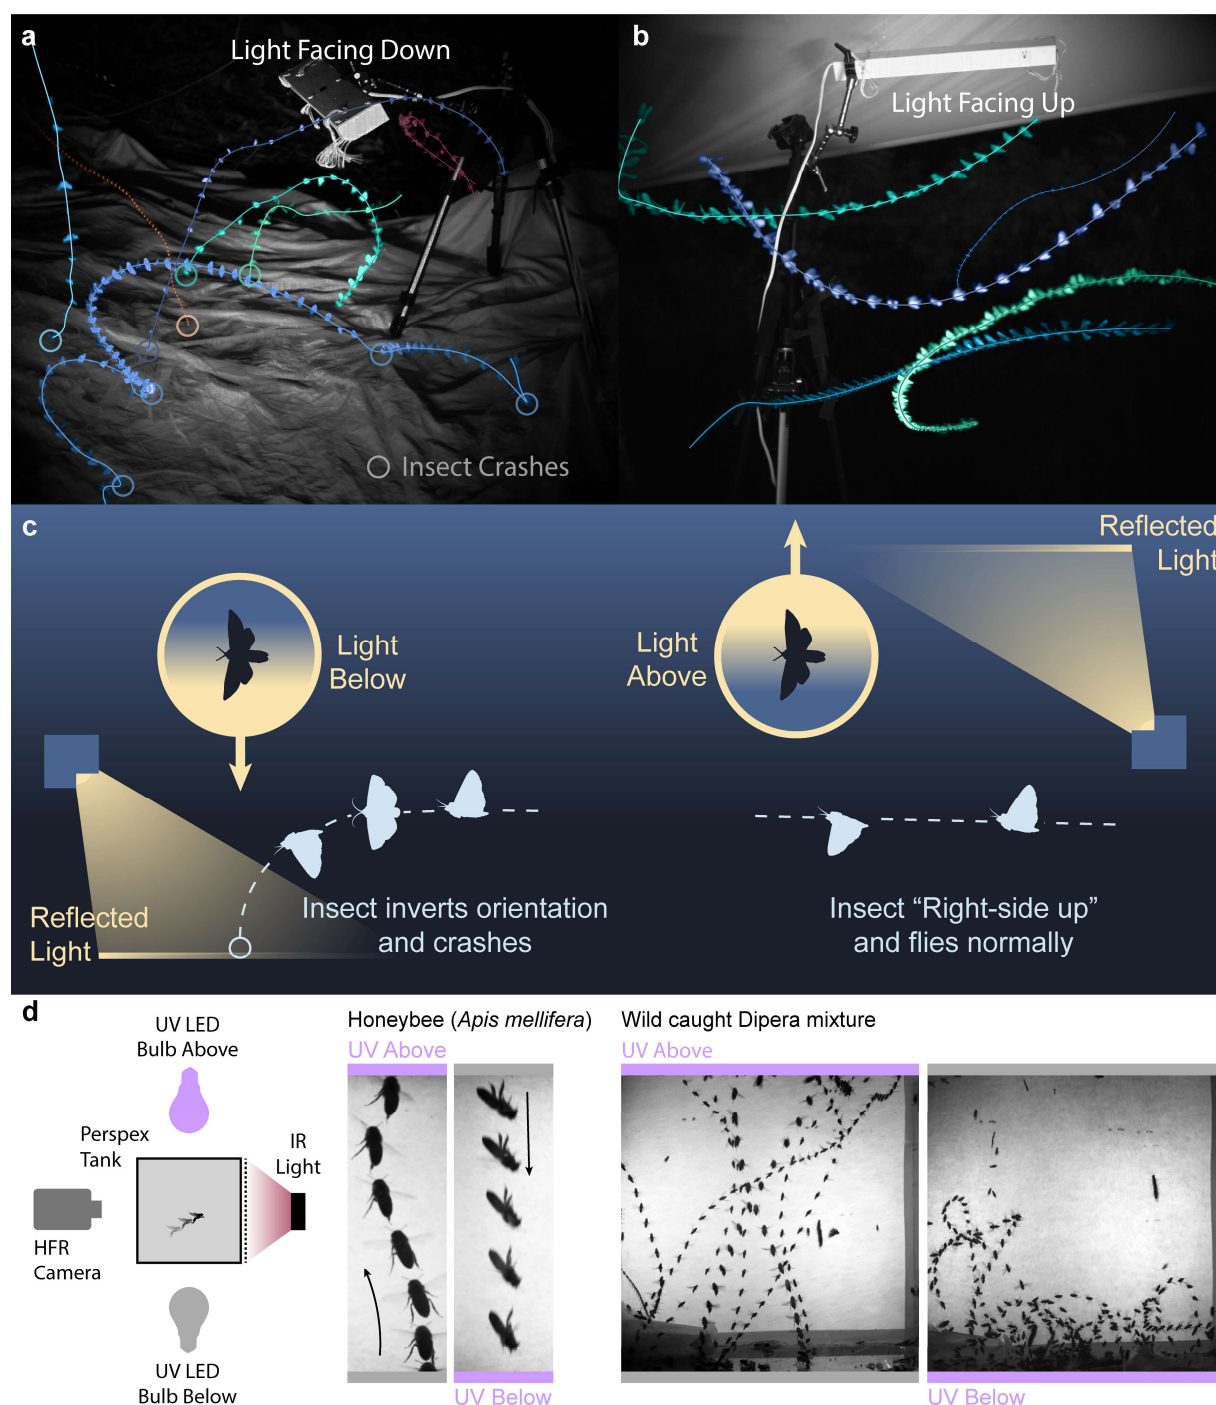

**Figure 4:** The effect of reflected light was strongly dependent on whether it came from below or above the insect. **a**, Example trajectories of insects attempting to fly above a white sheet illuminated by a downward facing UV light tube. **b**, Example trajectories of insects flying under a white sheet illuminated by an upward facing UV light tube. **c**, A diagrammatic representation of

625 the hypothesised behavioural effect of 'light trapping' (*left*) vs. flight under a diffuse canopy  
 626 (*right*). The strong effect of light directionality was also present in Honeybees and Diptera, both  
 627 being unable to sustain flight when UV light came from below. **d**, Example trajectories of  
 628 Honeybees (every 30 ms), mixed wild Diptera (every 10 ms) flight with UV light provided above  
 629 or below.  
 630

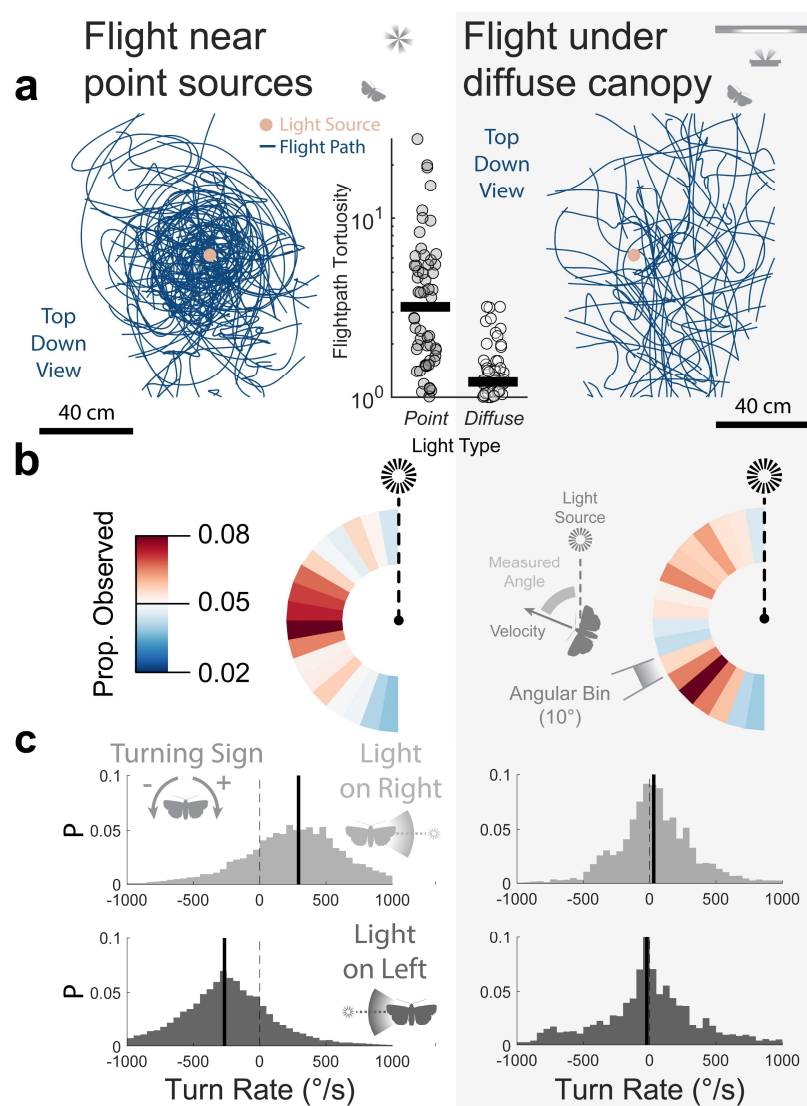

**Figure 5:** We applied quantitative measures to the flight of insects around a point light source (left) and under a diffuse canopy (right). Data presented from point sources came from randomly selected trials to match the sample size of the trajectories under diffuse canopy ( $n = 56$  each). **a**, As visible from their flight trajectories (viewed top-down), insects took tortuous circling paths around a point light source (*left*) and more direct flight under a diffuse canopy (*right*). The tortuosity of each trajectory is also plotted (*centre*). Insects travelling around a point light source predominantly travelled orthogonally to the direction of the light source, an effect not

639 seen under a diffuse canopy. **b**, Horizontal velocity orientation of insect flight relative to the  
 640 position of the light source, coloured by the proportion observed. Insects also preferentially  
 641 turned toward the direction of the light source when flying near a point light source, but not when  
 642 under a diffuse canopy. **c**, The horizontal turn rate distribution (positive for rightward, negative  
 643 for leftward) for insects when the light was (top) on their right, and (bottom) on their left. Vertical  
 644 bars indicate median values.  
 645

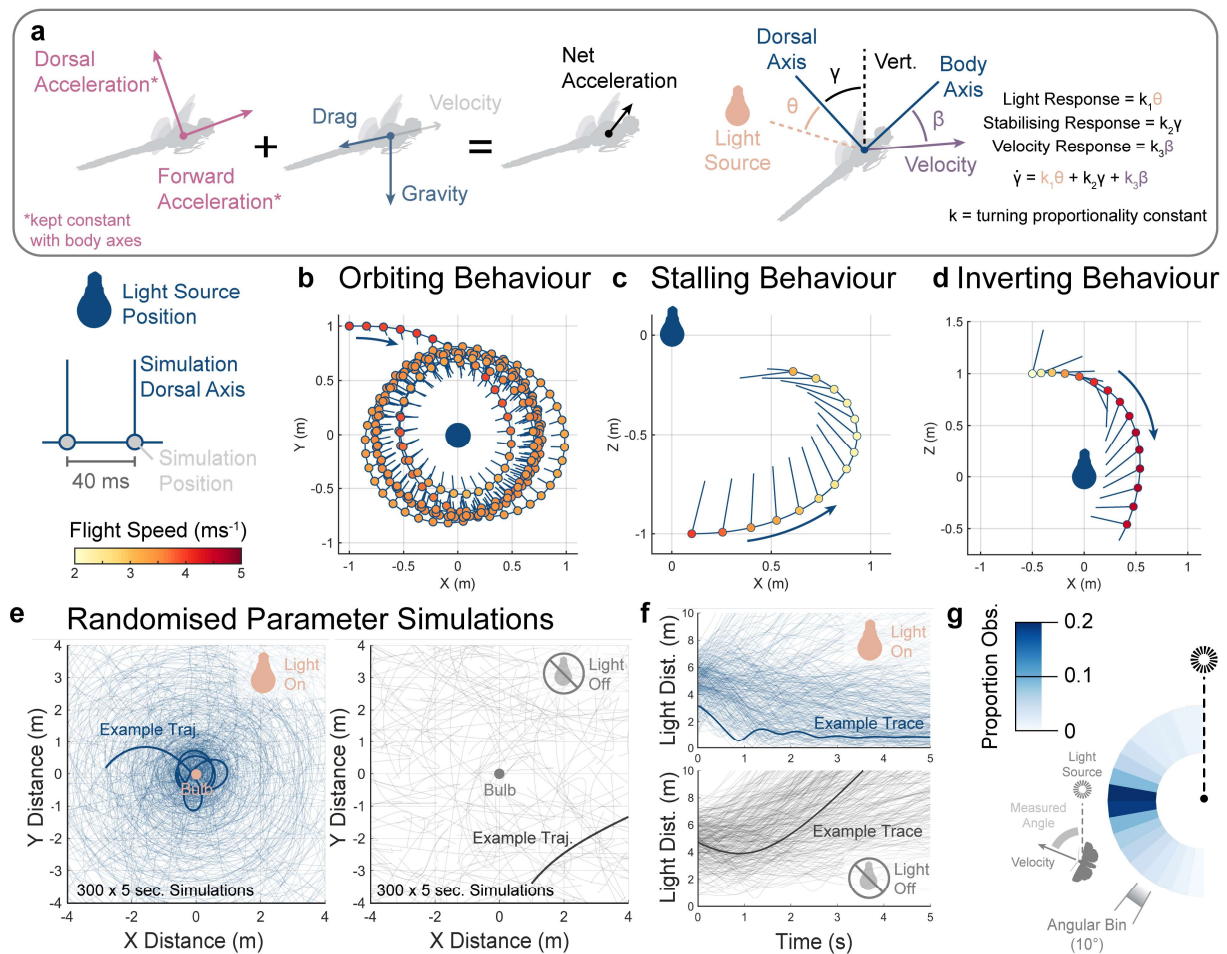

**Figure 6:** We simulated the flight of insects assuming that the direction of their produced accelerations was limited by their body orientation. We used a proportional controller with three inputs to simulate the hypothesised dorsal tilting behaviour around a light source. **a**, Diagrammatic representation of the net acceleration experienced by the simulated insect (*left*) and the simulated proportional steering controller rotating the body reference frame (*right*). We initiated the same simulated agent in three starting positions, generating the three behavioural motifs observed in the field. **b**, Simulated light entrapment behaviour during an orbiting motif viewed top-down. Flight speed is coded by scatter point colour. **c**, Stalling motif model reconstruction, with track viewed side-on. **d**, Inverting motif model reconstruction, with track viewed side-on. We randomised the model free parameters within set envelopes to ensure the

657 simulated light entrapment was not a product of exact parameter values. **e**, Top-down plots of  
658 the trajectories taken by 300, 5-second, simulations with randomised free parameters.  
659 Simulations either tilted their dorsal axes toward the light (Light On, left) or were unaffected by  
660 the light (Light Off, right). A randomly chosen example trajectory is overlaid in bold for  
661 illustration. **f**, Overlaid trajectories of the simulations' distance to light over time for dorsal tilting  
662 (*top*) and unaffected (*bottom*) trajectories. The same example trajectories as in **e** are overlaid in  
663 bold for both. Simulated agents predominantly travelled orthogonally to the direction of the light,  
664 as seen both in field and laboratory observations of real insects. **g**, The orientation of the  
665 velocity vectors of the dorsal tilting simulations relative to the light source, coloured by the  
666 proportion observed.



# Field Stereo-Videography

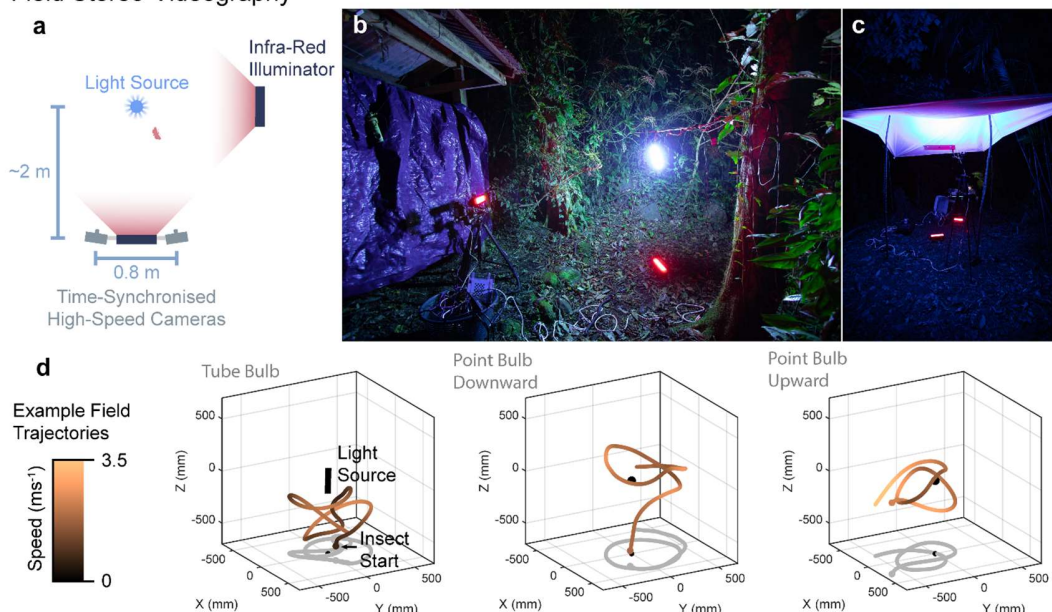

# Laboratory Motion Capture

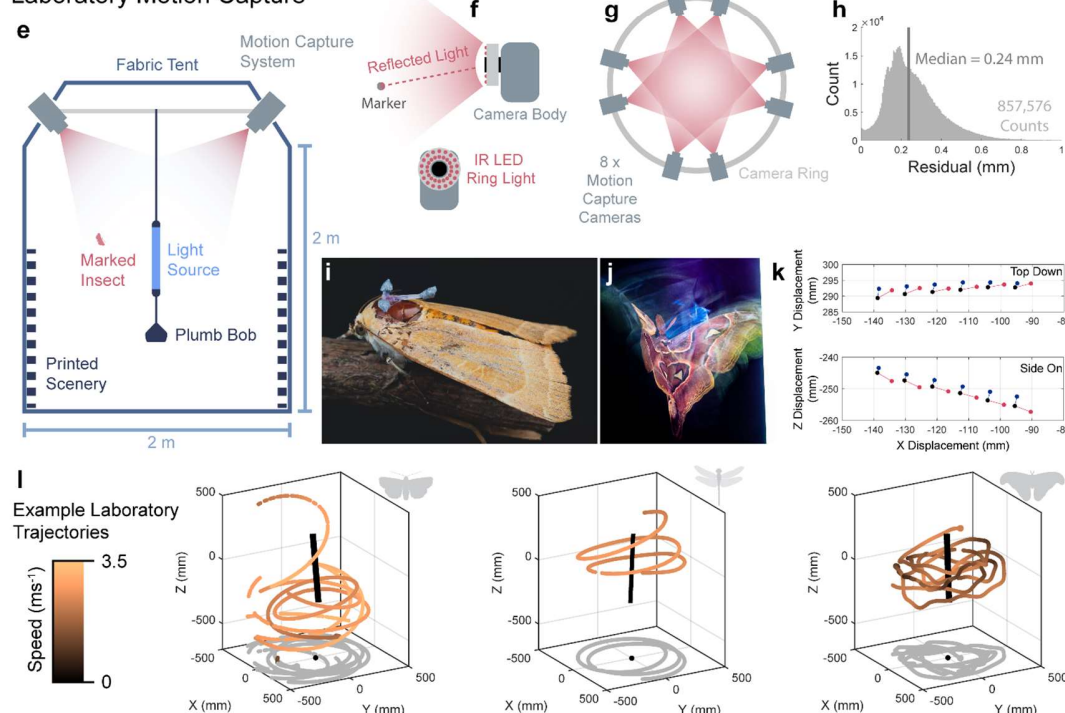

**Supplementary Figure 1: a**, A diagram of the high-speed stereo-videographic field setup

from a top-down perspective. **b**, A photograph of the field setup at CIEE, Montevideo, Costa



671 Rica. **c**, A photograph of the diffuse canopy experimental setup. **d**, Example digitised 3D flight  
672 trajectories from the field. **e**, A diagrammatic representation of the setup for laboratory-based  
673 motion capture experiments. **f**, A diagram of the principles underlying motion capture recording.  
674 **g**, A diagram of the orientation of the motion capture recordings from a top-down perspective. **h**,  
675 A histogram of the residual (distance between lines of sight for multiple cameras, reflecting  
676 estimated error) across all marker recordings. **i**, *Noctua pronuba* with marker-frame attached to  
677 the dorsal side of the thorax. **j**, *Attacus lorquinii* in flight with marker-frame attached to the dorsal  
678 side of the thorax. **k**, Example trace of 6 successive frames of reconstructed markers from an  
679 insect in flight. **l**, Example 3D tracks for 3 of the study species: *Noctua pronuba* (left),  
680 *Sympetrum striolatum* (middle), *Attacus lorquinii* (right).

681

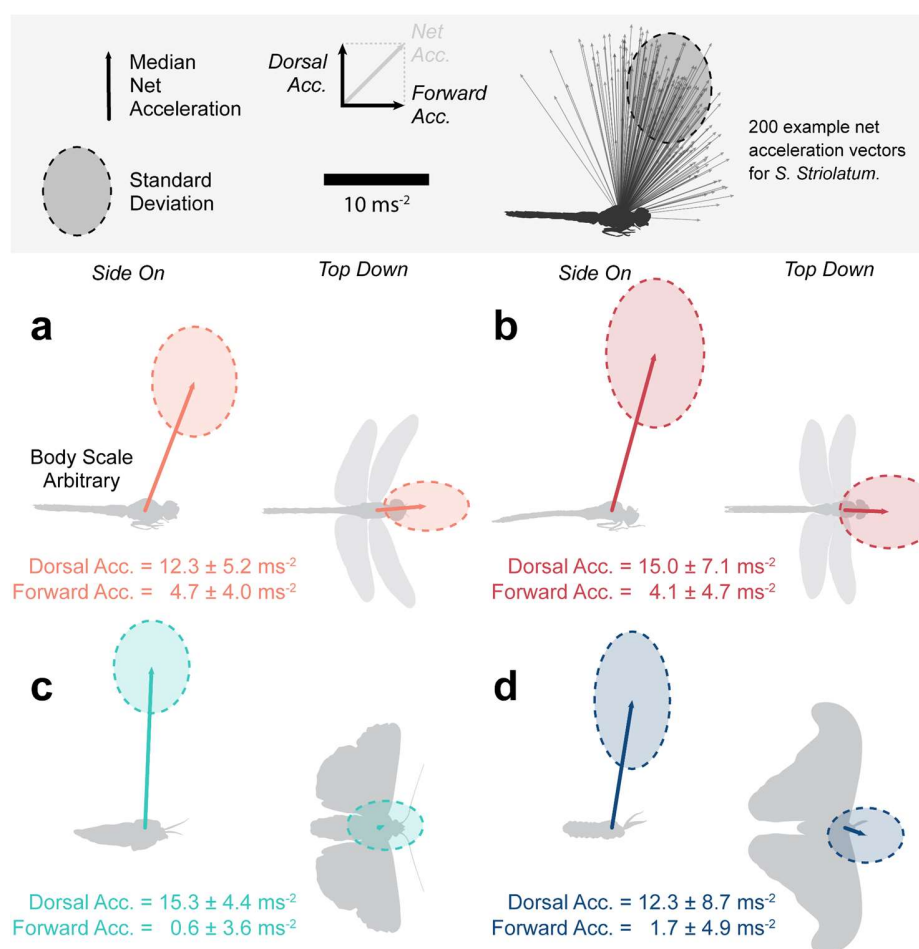

**Supplementary Figure 2:** Our flight simulations assumed that insects created accelerations within a limited range of directions relative to their bodies. We measured the body-centric acceleration of insects flying within our motion capture arena, accounting for the component counteracting gravity. The mean and standard deviation of net accelerations (excluding gravitational acceleration) during flight are plotted in the body reference frame for a single individual of **a**, *Sympetrum striolatum*, **b**, *Aeshna mixta*, **c**, *Noctua pronuba*, and **d**, *Attacus lorquinii*. Acceleration vectors were averaged per wingbeat to account for within wingbeat repeated variation for each species before being included in the dataset.

692

# Celestial Compass Simulations

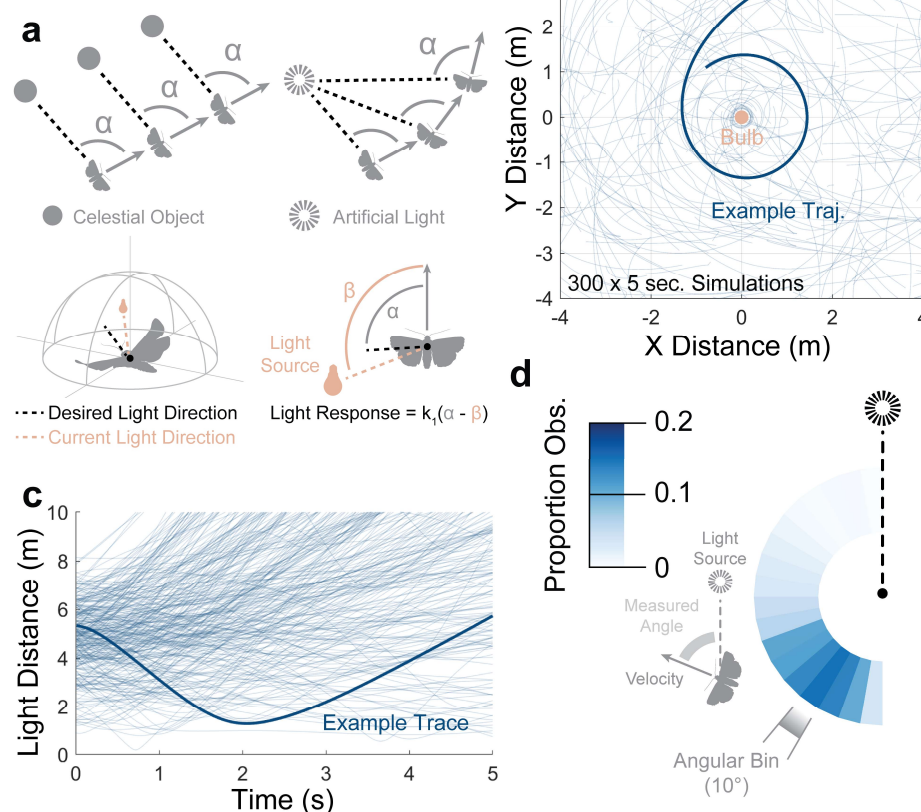

693 **Supplementary Figure 3:** One suggested hypothesis for insect light entrapment involves the  
694 confusion of a celestial compass cue. **a**, (*Top Left*) Flying insects can use distant celestial  
695 objects as compass cues to maintain a consistent heading. (*Top Right*) If they confused an  
696 artificial light source for their compass cue, it's proximity would lead to their travelling in curving  
697 spirals. (*Bottom row*) We adapted our flight simulations such that agents would attempt to keep  
698 the light source close to an arbitrary but fixed visual location (set by the initial line-of-sight to the  
699 light). Agents steered in proportion to the magnitude of the discrepancy between the desired  
700 and current light directions. **b**, Top-down plots of the trajectories taken by 300, 5-second,  
701 simulations with randomised free parameters. **c**, Overlaid trajectories of the simulations'  
702 distance to light over time. Agents travelling with a confused celestial compass cue did not

703 display the tendency to travel orthogonally to the light source seen in real insects and in DLR  
 704 simulations. **d**, The orientation of the velocity vectors of the celestial compass simulations  
 705 relative to the light source, coloured by the proportion observed.  
 706

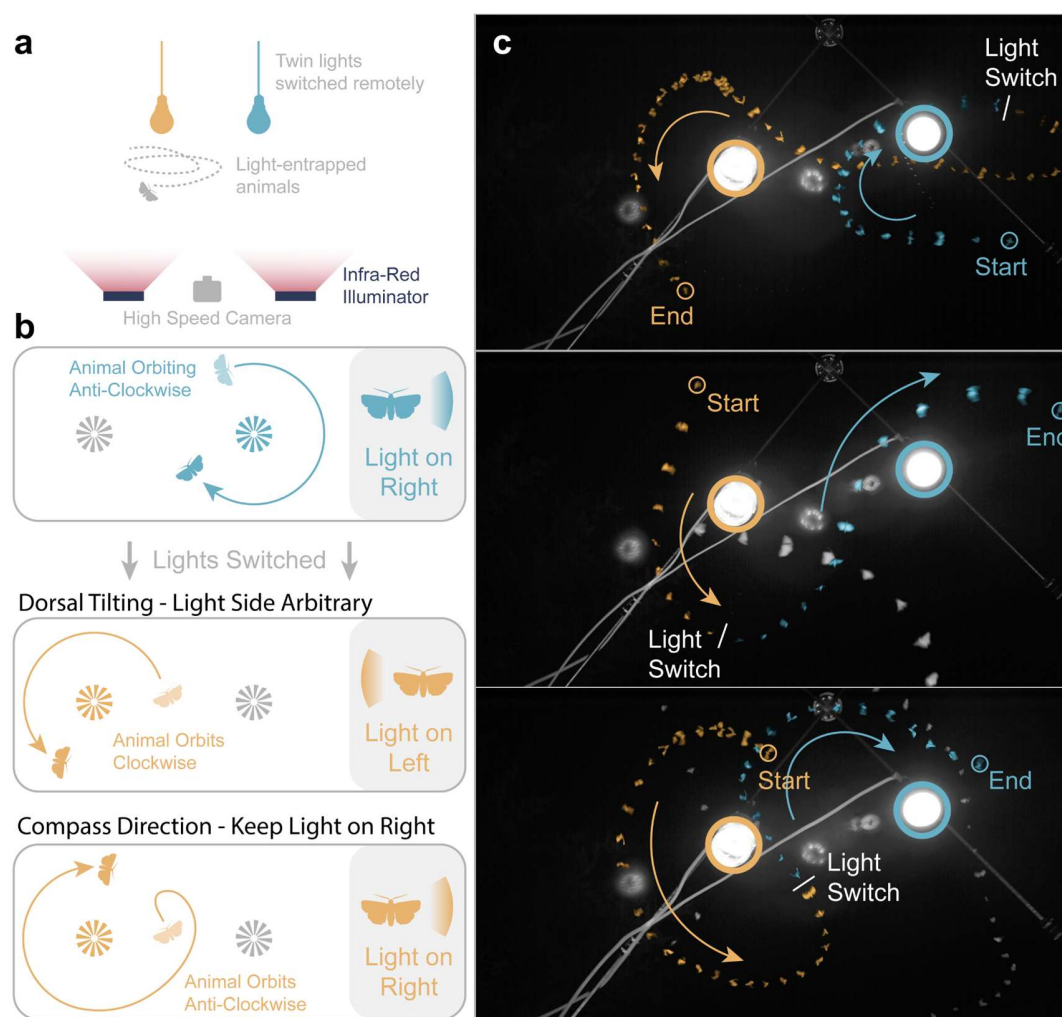

**Supplementary Figure 4:** If insects orbiting light sources were confusing the light with a

compass cue such as the moon, we would expect them to maintain an orbit only in one direction. We switched between two lights when *N. pronuba* were orbiting beneath to test whether they would maintain the direction of their orbit on a new light. **a**, A diagram of the light switching set-up. **b**, Illustrations of the alternative path outcomes from light switching, given an initial insect travelling in an anti-clockwise direction. Orbiting moths readily switched their orbiting when the lights were changed. **c**, Image overlays (every 20 ms) of the light switching

715 viewed from below, with insects false-coloured corresponding to the light concurrently lit. Arrows  
716 indicate direction of travel.  
717

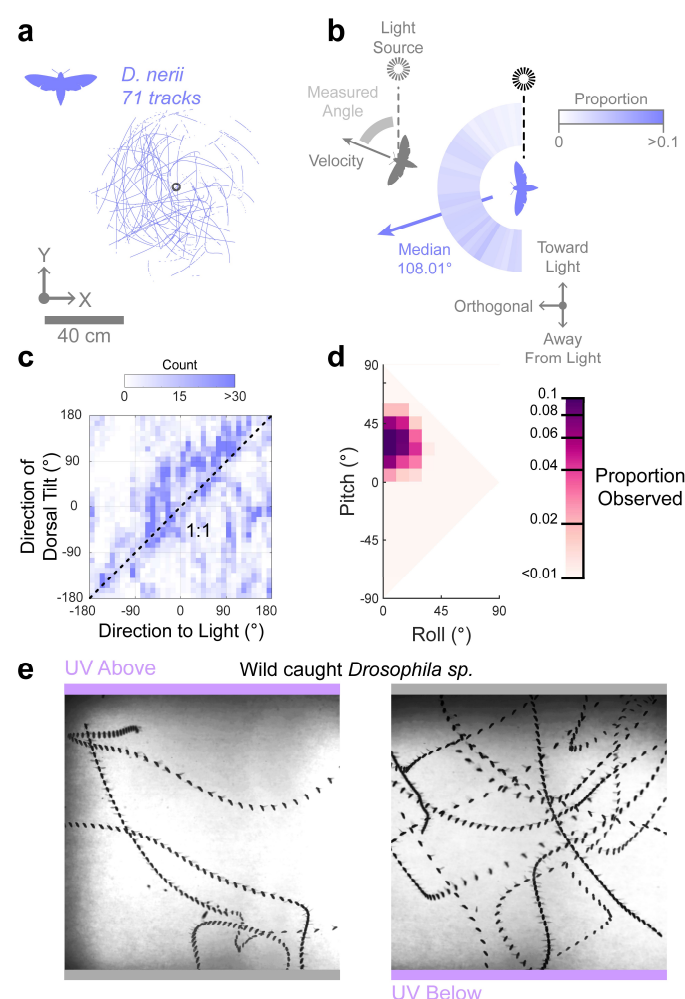

**Supplementary Figure 5:** Two species did not display light-centric behavioural motifs in the laboratory environment. **a**, Top-down plotted flight tracks for the Oleander Hawkmoth (*Daphnis nerii*). **b**, The relative prevalence of the insects' horizontal velocity orientation relative to the light. **c**, The directions of the vectors of the insect's dorsal axis, and connecting the insect to the light source are compared on the ground plane. Horizontal reference frame is fixed but arbitrary. **d**, The orientations of our measured insects are plotted on axes of pitch and roll. **e**, Wild caught *Drosophila* spp. fly under (left) and over (right) a UV LED bulb.

## Supplementary Tables

**Table 1:** Summary of sample sizes of digitised trajectories for the field trials (Total = 344).

| Actinic<br>Tube | Point Bulb<br>(downward) | Point Bulb<br>(upward) | Diffuse<br>Canopy |
|-----------------|--------------------------|------------------------|-------------------|
| 120             | 80                       | 88                     | 56                |

**Table 2:** Summary of sample sizes and tracks for the various mo-cap conditions (Total = 525).

| Species                     | Actinic<br>Tube | Point Bulb<br>(downward) | Point Bulb<br>(upward) | Control |
|-----------------------------|-----------------|--------------------------|------------------------|---------|
| <i>Sympetrum striolatum</i> | 57              | 53                       | 61                     | 26      |
| <i>Aeshna mixta</i>         | 20              | 5                        | 47                     | 11      |
| <i>Noctua pronuba</i>       | 90              | 33                       | 0                      | 20      |
| <i>Attacus lorquinii</i>    | 19              | 44                       | 25                     | 11      |
| <i>Daphnis nerii</i>        | 9               | 16                       | 46                     | 0       |

## Supplementary Videos

We have supplied our supplementary videos within the required online submission section.

## References

1. Dey, P. Fluttering to the Flame: Moths in Art, Literature, and Poetry. *Round glass Sustain* (2022).
2. Ford, E. B. Moths (The “New Naturalist” Series). *London* (see pp. 63--66) (1955).



3. Gardiner, B. O. C. The very first light-trap, 1565. *Entomologist's Record and Journal of Variation* 45–46 (1995).
4. van Langevelde, F., Ettema, J. a., Donners, M., WallisDeVries, M. F. & Groenendijk, D. Effect of spectral composition of artificial light on the attraction of moths. *Biol. Conserv.* **144**, 2274–2281 (2011).
5. Yela, J. L. & Holyoak, M. Effects of moonlight and meteorological factors on light and bait trap catches of Noctuid moths (Lepidoptera: Noctuidae). *Environ. Entomol.* **26**, 1283–1290 (1997).
6. Robinson, H. S. On the behaviour of night-flying insects in the neighbourhood of a bright source of light. *Proc. R. Entomol. Soc. Lond.* **27**, 13–21 (1952).
7. Mazokhin-Porshnyakov, G. A. Why insects fly to light by night. *Revue d'Entomologie de l'URSS* **39**, 52–58 (1960).
8. Sothibandhu, S. & Baker, R. R. Celestial orientation by the large yellow underwing moth, *Noctua pronuba* L. *Animal Behaviour* **27**, 786–800 (1979).
9. Callahan, P. S. Far Infra-red Emission and Detection by Night-flying Moths. *Nature* **206**, 1172–1173 (1965).
10. Robinson H., S. & Robinson P., J. Some notes on the observed behaviour of Lepidoptera In flight in the vicinity of light sources. *Entomol. Gaz.* **1**, 3–15 (1950).
11. Hsiao, H. S. Flight paths of night-flying moths to light. *J. Insect Physiol.* **19**, 1971–1976 (1973).
12. Boyes, D. H., Evans, D. M., Fox, R., Parsons, M. S. & Pocock, M. J. O. Is light pollution driving moth population declines? A review of causal mechanisms across the life cycle. *Insect Conserv. Divers.* **14**, 167–187 (2021).
13. Owens, A. C. S. & Lewis, S. M. The impact of artificial light at night on nocturnal insects: A review and synthesis. *Ecol. Evol.* **8**, 11337–11358 (2018).
14. Gaydecki, P. Automated moth flight analysis in the vicinity of artificial light. *Bull. Entomol.*

*Res.* **109**, 127–140 (2019).

15. Hsiao, H. S. The attraction of moths (*Trichoplusia ni*) to infrared radiation. *J. Insect Physiol.*

**18**, 1705–1714 (1972).

16. Lees, D. & Zilli, A. Moths: Their biology, diversity and evolution. (2019).

17. Sourakov, A. & Chadd, R. W. *The Lives of Moths: A Natural History of Our Planet's Moth*

*Life*. (Princeton University Press, 2022).

18. Riley, J. R. Flying insects in the field. in *Video Techniques in Animal Ecology and*

*Behaviour* (ed. Wratten, S. D.) 1–15 (Springer Netherlands, 1994).

19. Sotthibandu, S. Behaviour of Moths in Relation to Light Traps. (University of Manchester,

1978).

20. Gaydecki, P. A. A Quantification of the Behavioural Dynamics of Certain Lepidoptera in

Response to Light. (Cranfield Inst. Technol., Bedford., 1984).

21. Nilsson, D.-E., Smolka, J. & Bok, M. The vertical light-gradient and its potential impact on

animal distribution and behavior. *Front. Ecol. Evol.* **10**, (2022).

22. Goodman, L. J. The role of certain optomotor reactions in regulating stability in the rolling

plane during flight in the desert locust, *Schistocerca gregaria*. *J. Exp. Biol.* **42**, 385–407

(1965).

23. Stange, G. The ocellar component of flight equilibrium control in dragonflies. *J. Comp.*

*Physiol.* **141**, 335–347 (1981).

24. Taylor, C. P. Contribution of compound eyes and ocelli to steering of locusts in flight: I.

behavioural analysis. *J. Exp. Biol.* **93**, 1–18 (1981).

25. Wehner, R. Astronavigation in Insects. *Annu. Rev. Entomol.* **29**, 277–298 (1984).

26. Mittelstaedt, H. Physiologie des Gleichgewichtssinnes bei fliegenden Libellen. *Z. Vgl.*

*Physiol.* **32**, 422–463 (1950).

27. Mittelstaedt, H. Interaction of eye-, head-, and trunk-bound information in spatial perception

and control. *J. Vestib. Res.* **7**, 283–302 (1997).

28. Hengstenberg, R. Multisensory control in insect oculomotor systems. *Rev. Oculomot. Res.* **5**, 285–298 (1993).
29. Goulard, R., Verbe, A., Vercher, J.-L. & Viollet, S. Role of the light source position in freely falling hoverflies' stabilization performances. *Biol. Lett.* **14**, (2018).
30. Fabian, S. T., Zhou, R. & Lin, H.-T. Dragondrop: a novel passive mechanism for aerial righting in the dragonfly. *Proc. Biol. Sci.* **288**, 20202676 (2021).
31. Bode-Oke, A. T. & Dong, H. The reverse flight of a monarch butterfly (*Danaus plexippus*) is characterized by a weight-supporting upstroke and postural changes. *J. R. Soc. Interface* **17**, 20200268 (2020).
32. Sane, S. P. The aerodynamics of insect flight. *J. Exp. Biol.* **206**, 4191–4208 (2003).
33. Dickinson, M. H. & Muijres, F. T. The aerodynamics and control of free flight manoeuvres in *Drosophila*. *Philos. Trans. R. Soc. Lond. B Biol. Sci.* **371**, (2016).
34. Kamikouchi, A. *et al.* The neural basis of *Drosophila* gravity-sensing and hearing. *Nature* **458**, 165–171 (2009).
35. Mischiati, M. *et al.* Internal models direct dragonfly interception steering. *Nature* **517**, 333–338 (2015).
36. Shimoda, M. & Honda, K.-I. Insect reactions to light and its applications to pest management. *Appl. Entomol. Zool.* **48**, 413–421 (2013).
37. Ros, I. G., Bassman, L. C., Badger, M. A., Pierson, A. N. & Biewener, A. A. Pigeons steer like helicopters and generate down- and upstroke lift during low speed turns. *Proc. Natl. Acad. Sci. U. S. A.* **108**, 19990–19995 (2011).
38. Robin Baker, R. Integrated use of moon and magnetic compasses by the heart-and-dart moth, *Agrotis exclamatoris*. *Anim. Behav.* **35**, 94–101 (1987).
39. Brehm, G. *et al.* Moths are strongly attracted to ultraviolet and blue radiation. *Insect Conserv. Divers.* **14**, 188–198 (2021).
40. Iyer, G. & Kitching, I. J. A preliminary study of the hawkmoth diversity (Lepidoptera:

Sphingidae) of Kanyakumari District, Tamil Nadu, India. *J. Threat. Taxa* **11**, 13592–13604 (2019).

41. Janzen, D. H. Two ways to be a tropical big moth: Santa Rosa saturniids and sphingids. in *Oxford surveys in Evolutionary Biology* (eds. Dawkins, R. & Ridley, M.) vol. 1 85–142 (1984).

42. de Croon, G. C. H. E. *et al.* Accommodating unobservability to control flight attitude with optic flow. *Nature* **610**, 485–490 (2022).

43. Palmer, G. & Johnsen, S. Downwelling spectral irradiance during evening twilight as a function of the lunar phase. *Appl. Opt.* **54**, B85 (2014).

44. Sponberg, S., Dyhr, J. P., Hall, R. W. & Daniel, T. L. Luminance-dependent visual processing enables moth flight in low light. *Science* **348**, 1245–1248 (2015).

45. Hengstenberg, R. & Bayer, N. The importance of gravity for roll control during flight in the blowfly *Calliphora*. *Verh. Dtsch. Zool. Ges.* **81**, 203 (1988).

46. Degen, T. *et al.* Street lighting: sex-independent impacts on moth movement. *J. Anim. Ecol.* **85**, 1352–1360 (2016).

47. Baker, R. Moths: Population estimates, light-traps and migration. in *Case Studies in Population Biology* (ed. Cook, L. M.) 188–211 (Manchester University Press: Manchester, 1985).

48. Baker R, R. & Sadovy, Y. The distance and nature of the light-trap response of moths. *Nature* **276**, 818–821 (1978).

49. Foster, J. J. *et al.* Light pollution forces a change in dung beetle orientation behavior. *Curr. Biol.* (2021) doi:10.1016/j.cub.2021.06.038.

50. Degen, J. *et al.* Streetlights affect moth orientation beyond flight-to-light behaviour. *bioRxiv* 2022.10.06.511092 (2022) doi:10.1101/2022.10.06.511092.

51. Davidson, A., Gallagher, J. E. & Hsiao, H. S. Reactions of Some Moths and Aquatic Insects to Light Traps Fitted with Polarizing Filters. *Ann. Entomol. Soc. Am.* **66**, 232–233 (1973).
